# Supplementary material
Source: publisher site journal article supplement (https://www.dovepress.com/get_supplementary_file.php?f=473580.docx)
Supplement: Supplementary file 1 [file get_supplementary_file.php]

**Supplementary Table 1** PCR Primers Used in This Study

| **Gene** | **Sequence (5’ – 3’)** | **Amplicon Size (bp)** | **Reference number** |
| --- | --- | --- | --- |
| acrA | F: GCCTCTGGCGGTCGTTCTGAT | 126 bp | 1 |
| R: AGAGGTTCGGATTTGAGCGTCAC |
| acrB | F: GTGAGCGTCGAGAAATCGTCCA | 127 bp | 1 |
| R: TACGGCTGATGGCGTCCTTCAT |
| ramA | F:GGGGAGAGCAGTATGACCATTT | 151 bp | 2 |
| R:TGTATTGCATAAACAGCCGCTG |
| soxS | F:GTCGCATCAGCAAATTATTCAGAC | 128 bp | 3 |
| R:TGCGGAACATTCTCTGTAAATACC |
| phoP | F:GAGGATAACGCATTGCTACG | 65 bp | 4 |
| R:TCCACCTGATGTCCCATCTC |
| phoQ | F:YACCCTGCGWTCVATGCGC | 139 bp | 5 |
| R:CARHARSGCGCTKCCGGAAC |
| rpoB | F:AAGGCGAATCCAGCTTGTTCAGC | 148 bp | 6 |
| R:TGACGTTGCATGTTCGCACCCATCA |

**References**

1. Pérez A, Poza M, Aranda J, et al. Effect of Transcriptional Activators SoxS, RobA, and RamA on Expression of Multidrug Efflux Pump AcrAB-TolC in Enterobacter cloacae. *Antimicrobial Agents and Chemotherapy*. 2012;56(12):6256-6266. doi:10.1128/aac.01085-12

2. Tryniszewska E, Radziwon P, Niklinski J, et al. Expression of AraC/XylS stress response regulators in two distinct carbapenem-resistant Enterobacter cloacae ST89 biotypes. *Journal of Antimicrobial Chemotherapy*. 2020;75(5):1146-1150. doi:10.1093/jac/dkz569

3. Liu H, Jia X, Zou H, et al. Detection and characterization of tigecycline heteroresistance in E. cloacae: clinical and microbiological findings. *Emerging Microbes & Infections*. 2019;8(1):564-574. doi:10.1080/22221751.2019.1601031

4. Landman D, Salamera J, Quale J. Irreproducible and Uninterpretable Polymyxin B MICs for Enterobacter cloacae and Enterobacter aerogenes. *Journal of Clinical Microbiology*. 2013;51(12):4106-4111. doi:10.1128/jcm.02129-13

5. Hong Y-K, Ko KS. PmrAB and PhoPQ Variants in Colistin-Resistant Enterobacter spp. Isolates in Korea. *Current Microbiology*. 2019;76(5):644-649. doi:10.1007/s00284-019-01672-1

6. Hornsey M, Ellington MJ, Doumith M, Scott G, Livermore DM, Woodford N. Emergence of AcrAB-mediated tigecycline resistance in a clinical isolate of Enterobacter cloacae during ciprofloxacin treatment. *International Journal of Antimicrobial Agents*. 2010;35(5):478-481. doi:10.1016/j.ijantimicag.2010.01.011

**Supplementary Table 2** MICs of 23 Colistin-Resistant ECC Strains

| Strains | TZP | ATM | CAZ | CRO | FEP | IPM | AK | GEN | TOB | CIP | LEV | SXT | NIT | TGC |
| --- | --- | --- | --- | --- | --- | --- | --- | --- | --- | --- | --- | --- | --- | --- |
| ecl01 | ≤4 | ≤1 | ≤1 | ≤1 | ≤1 | ≤1 | ≤2 | ≤1 | ≤1 | ≤0.25 | ≤0.25 | ≤1/19 | ≤16 | 2 |
| ecl02 | ≤4 | ≤1 | ≤1 | ≤1 | ≤1 | ≤1 | ≤2 | ≤1 | ≤1 | ≤0.25 | ≤0.25 | ≤1/19 | 32 | 1 |
| ecl04 | ≤4 | ≤1 | ≤1 | ≤1 | ≤1 | ≤1 | ≤2 | ≤1 | ≤1 | ≤0.25 | ≤0.25 | ≤1/19 | 32 | 1 |
| ecl05 | 64 | ≥64 | ≥64 | ≥64 | ≤1 | ≤1 | ≤2 | ≤1 | ≤1 | ≤0.25 | ≤0.25 | ≤1/19 | 32 | 0.25 |
| ecl07 | ≥128 | ≥64 | ≥64 | ≥64 | 2 | 2 | ≤2 | ≤1 | ≤1 | 1 | 1 | ≤1/19 | 128 | 0.5 |
| ecl08 | ≤4 | ≤1 | ≤1 | ≤1 | ≤1 | ≤1 | ≤2 | ≤1 | ≤1 | ≤0.25 | ≤0.25 | ≤1/19 | ≤16 | 2 |
| ecl09 | ≤4 | ≤1 | ≤1 | ≤1 | ≤1 | ≤1 | ≤2 | ≤1 | ≤1 | ≤0.25 | ≤0.25 | ≤1/19 | 32 | 1 |
| ecl11 | ≤4 | ≤1 | ≤1 | 0.19 | ≤1 | 2 | ≤2 | ≤1 | ≤1 | 2 | 4 | ≤1/19 | 32 | 1 |
| ecl12 | 64 | ≥64 | ≥64 | 32 | 8 | ≤1 | 4 | ≥16 | ≥16 | ≥4 | ≥8 | ≥16/304 | 128 | 1 |
| ecl13 | ≤4 | ≤1 | ≤1 | ≤1 | ≤1 | ≤1 | ≤2 | ≤1 | ≤1 | ≤0.25 | 0.5 | ≤1/19 | 32 | 0.25 |
| ecl14 | 64 | 16 | ≥64 | 32 | ≤1 | ≤1 | ≤2 | ≤1 | ≤1 | ≤0.25 | ≤0.25 | ≤1/19 | 32 | 0.5 |
| ecl15 | 64 | ≥64 | ≥64 | 32 | ≥64 | ≤1 | 4 | ≥16 | ≥16 | ≥4 | ≥8 | ≤1/19 | 32 | 1 |
| ecl16 | 64 | ≥64 | 32 | ≥64 | 8 | ≤1 | 4 | ≥16 | ≥16 | ≥4 | ≥8 | ≥16/304 | 64 | 2 |
| ecl17 | ≤4 | ≤1 | ≤1 | ≤1 | ≤1 | ≤1 | ≤2 | ≤1 | ≤1 | ≤0.25 | ≤0.25 | ≤1/19 | 32 | 2 |
| ecl18 | 64 | ≥64 | ≥64 | ≥64 | ≤1 | ≤1 | ≤2 | ≤1 | ≤1 | ≤0.25 | ≤0.25 | ≤1/19 | 64 | 2 |
| ecl19 | ≥128 | ≥64 | ≥64 | ≥64 | 4 | 2 | ≤2 | ≤1 | ≤1 | ≤0.25 | ≤0.25 | ≤1/19 | 32 | 2 |
| ecl20 | ≤4 | ≤1 | ≤1 | ≤1 | ≤1 | ≤1 | ≤2 | ≤1 | ≤1 | ≤0.25 | ≤0.25 | ≤1/19 | 32 | 1 |
| ecl21 | ≤4 | ≤1 | ≤1 | ≤1 | ≤1 | ≤1 | ≤2 | ≤1 | ≤1 | ≤0.25 | ≤O.25 | ≤1/19 | ≤16 | 0.25 |
| ecl22 | ≤4 | ≤1 | ≤1 | ≤1 | ≤1 | ≤1 | ≤2 | ≤1 | ≤1 | ≤0.25 | ≤0.25 | ≤1/19 | 32 | 1 |
| ecl24 | 64 | 16 | ≥64 | ≥64 | ≤1 | ≤1 | ≤2 | ≤1 | ≤1 | ≤0.25 | ≤0.25 | ≤1/19 | 32 | 0.5 |
| ecl25 | 64 | 32 | ≥64 | ≥64 | ≤1 | ≤1 | ≤2 | ≤1 | ≤1 | ≤0.25 | ≤0.25 | ≤1/19 | 32 | 0.25 |
| ecl26 | ≤4 | ≤1 | ≤1 | ≤1 | ≤1 | ≤1 | ≤2 | ≤1 | ≤1 | ≤0.25 | ≤0.25 | ≤1/19 | ≤16 | 0.5 |
| ecl27 | 64 | 32 | ≥64 | ≥64 | ≤1 | ≤1 | ≤2 | ≤1 | ≤1 | ≤0.25 | ≤0.25 | ≤1/19 | 32 | 0.5 |

**Abbreviations:** MICs, Minimum Inhibitory Concentrations; ECC, *Enterobacter cloacae* complex; TZP, piperacillin-tazobactam; ATM,aztreonam; CAZ,ceftazidime; CRO, ceftriaxone; FEP,efepime; IPM, imipenem; AK, amikacin; GEN, gentamicin; TOB, tobramycin; CIP, ciprofloxacin; LEV, levofloxacin; SXT, trimethoprim-sulfamethoxazole; NIT,nitrofurantoin; TGC, tigecycline; CST,colistin; CCCP, carbonyl cyanide chlorophenylhydrazone.

**Supplementary Table 3** Efflux pump genes of 23 ECC strains

| Strain | Efflux pump genes |
| --- | --- |
| ecl01 | mdfA,vgaC,mdtA,mdtB,mdtC,mdtK,mdtG,mdtH,acrA,acrB,acrD,acrF,tolC,msbA,oqxA,oqxB,emrA,emrB,emrD,emrR,yoji |
| ecl02 | mdfA,vgaC,mdtA,mdtB,mdtC,mdtK,mdtG,mdtH,acrA,acrB,acrD,tolC,msbA,oqxA,oqxB,emrA,emrB,emrD,emrR,yoji,macB |
| ecl04 | mdfA,mdtA,mdtB,mdtC,mdtK,mdtG,mdtH,acrA,acrB,acrD, acrF,tolC,msbA,oqxA,oqxB,emrA,emrB,emrD,emrR,yoji |
| ecl05 | mdfA,mdtA,mdtB,mdtC,mdtK,mdtH,acrA,acrB,acrD,acrE,tolC,msbA,oqxA,oqxB,emrA,emrB,emrD,emrR,yoji,macB |
| ecl07 | mdfA,vgaC,mdtA,mdtB,mdtC,mdtK,mdtG,mdtH,acrA,acrB,acrD,tolC,msbA,oqxA,oqxB,emrA,emrB,emrD,emrR,yoji |
| ecl08 | mdfA,vgaC,mdtA,mdtB,mdtC,mdtK,mdtG,mdtH,acrA,acrB,acrD,acrF,tolC,msbA,oqxA,oqxB,emrA,emrB,emrD,emrR,yoji |
| ecl09 | mdfA,mdtA,mdtB,mdtC,mdtK,mdtG,mdtH,acrA,acrB,acrD,tolC,msbA,oqxA,oqxB,emrA,emrB,emrD,emrR,yoji |
| ecl11 | mdfA,vgaC,mdtA,mdtB,mdtC,mdtK,mdtG,mdtH,acrA,acrB,acrD,tolC,msbA,oqxA,oqxB,emrA,emrB,emrD,emrR,yoji,macB |
| ecl12 | mdfA,mdtA,mdtB,mdtC,mdtK,mdtG,mdtH,acrA,acrB,acrD,tolC,msbA,oqxA,oqxB,emrA,emrB,emrD,emrR,yoji,tet(C) |
| ecl13 | mdfA,mdtA,mdtB,mdtC,mdtK,mdtH,acrA,acrB,acrD,tolC,msbA,oqxA,oqxB,emrA,emrB,emrD,emrR,yoji,macB |
| ecl14 | mdfA,vgaC,mdtA,mdtB,mdtC,mdtK,mdtH,acrA,acrB,acrD,acrR,,tolC,msbA,oqxA,oqxB,emrA,emrB,emrD,emrE,emrR,yoji,rosAB,mexB |
| ecl15 | mdfA,mdtA,mdtB,mdtC,mdtK,mdtG,mdtH,acrA,acrB,acrD,tolC,msbA,oqxA,oqxB,emrA,emrB,emrD,emrE,emrR,yoji,macB, tet(C) |
| ecl16 | mdfA,mdtA,mdtB,mdtC,mdtK,mdtG,mdtH,acrA,acrB,acrD,tolC,msbA,oqxA,oqxB,emrA,emrB,emrD,emrR,yoji |
| ecl17 | mdtA,mdtB,mdtC,mdtK,mdtG,mdtH,acrD,msbA,oqxA,oqxB,emrA,emrB,emrD,emrR,macB |
| ecl18 | mdfA,vgaC,mdtA,mdtB,mdtC,mdtK,mdtG,mdtH,acrA,acrB,acrD,tolC,msbA,oqxA,oqxB,emrA,emrB,emrD,emrR,yoji |
| ecl19 | mdfA,mdtA,mdtB,mdtC,mdtK,mdtG,mdtH,acrA,acrB,acrD,acrE,acrF,tolC,msbA,oqxA,oqxB,emrA,emrB,emrD,emrR,yoji,macB |
| ecl20 | mdfA,mdtA,mdtB,mdtC,mdtK,mdtG,mdtH,acrA,acrB,acrD,acrF,tolC,msbA,oqxA,oqxB,emrA,emrB,emrD,emrR,yoji |
| ecl21 | mdfA,vgac,mdtA,mdtB,mdtC,mdtK,mdtG,mdtH,acrA,acrB,acrD,tolC,msbA,oqxA,oqxB,emrA,emrB,emrD,emrE,emrR,yoji,macB,mexQ |
| ecl22 | mdfA,mdtA,mdtB,mdtC,mdtK,mdtG,mdtH,acrA,acrB,acrD,acrE,acrF,tolC,msbA,oqxA,oqxB,emrA,emrB,emrD,emrR,yoji,macB,tet(C) |
| ecl24 | mdtB,mdtC,acrA,acrB,acrD,msbA,oqxA,oqxB,emrB,emrR |
| ecl25 | mdtB,mdtC,acrA,acrB,acrD,msbA,oqxA,oqxB,emrB,emrR |
| ecl26 | mdtB,mdtC,acrA,acrB,acrD,msbA,oqxA,oqxB,emrB,emrR |
| ecl27 | mdtB,mdtC,acrA,acrB,acrD,msbA,oqxA,oqxB,emrB,emrR |

**Supplementary Table 4** Amino acid mutations in MgrB, PhoP, PhoQ, PmrA and PmrB proteins

| Strain | MgrB | PhoP | Phoq | PmrA | PmrB |
| --- | --- | --- | --- | --- | --- |
| ecl01 | V10I | L129I,F141L,N145D,N165S,H207Q | L4I,M5L,M9L,M34L,K64T,N67D,Q69H,S71T,N79D,V102I,V106A,S131T,L133I,L139M,K141Q,M155L,L163I,P168M,D169N,V178I,R190K,V196I,I212V,K226R,S244T,M298L,R423I,S448A,G464S,N485D | A19G,S21A,A31G,S64T,V71I,D72A,N89T,S93A,C143R,L146Q,R218S | A47S,L76F,Q91K,A94V,H132S,P168T,S171T,A172T,I184V,V205I,N210T,P233A,A260T,A270E,Q271V,D272E,R276Q,V277L,I295T,V319L,T327M, A331G |
| ecl02 | V10I | L129I,F141L,N145D,N165S,H207Q | K2R,L4I,M5L,I8L,M9L,N67D,Q69R,S171T,V102I,L133I,K141Q,P168L,D169N,V178I,R190M,G193S,S244T,M298L,S448A,G464S | A19G,S21A,A31G,V71I,D72N,N89T,S93A,C143Q,S145D,L146Q,P147A,R218S | Q91K,Y110F,H132S,Q135K,A163S,S167A,S171A,A172T,I184V,D209E,T213E,G216C,E218G,P233A,A270E,Q271V,R276Q,V277I,I295T,V319L,K325R,A331G,S344A |
| ecl04 | V10I | L129I,F141L,N145D,N165S,H207Q | K2R,L4I,M5L,M9L,M34L,K64T,N67D,Q69H,S71T,E76D,N79D,V102I,V106A,S131T,L133I,L139M,K141Q,L163V,P168M,D169N,V178I,R190K,I212V,K226R,S244T,R297K,M298L, R423L,S448A,G464S,N485D | A19G,S21A,A31G,S64T,V71I,D72A,N89T,S93A,C143R,L146Q,R218S | A47S,L76F,Q91K,A94V,H132S,P168T,S171T,A172T,I184V,V205I,N210T,P233A,A260T,A270E,Q271V,D272E,R276Q,V277L,I295T,V319L,T327M,A331G,S344A |
| ecl05 | V10I | L129I,F141L,N145D,N165S,H207Q | K2R,L4I,M5L,I8L,M9L,N67D,Q69R,S71T,V102I,L133I,K141Q,P168L,D169N,V178I,R190M,G193S,V196IS244T,R297K,M298L,S448A,G464S | A19G,S21A,A31G,V71I,D72A,N89T,S93A,C143Q,S145D,L146Q,P147A,R218S | Q91K,H132S,Q135K,A163S,S167A,S171T,A172T,I184V,D209E,T213E,E218G,P233A,A260S,A270E,Q271V,R276Q,V277I,I295T,V319L,K325R,A331G,S344A |
| ecl07 |  |  | K107R,S244T |  | I295T |
| ecl08 | V10I | L129I,F141L,N145D,N165S,H207Q | K2R,L4I,M5L,M9L,M34L,K64T,N67D,Q69H,S71T,N79D,V102I,V106A,S131T,L133I,L139M,K141Q,L163I,P168M,D169N,V178I,R190K,I212V,K226R,S244T,M298L,R423I,S448A,G464S,N485D | A19G,S21A,A31G,S64T,V71I,D72A,N89T,S93A,C143R,L146Q,R218S | A47S,L76F,Q91K,A94V,H132S,P168T,S171T,A172T,I184V,V205I,N210T,P233A,A260T,A270E,Q271V,D272E,R276Q,V277L,I295T,V319L,T327M,A331G |
| ecl09 | V10I | L129I,F141L,N145D,N165S,H207Q | K2R,L4I,M5L,M9L,M34L,K64T,N67D,Q69H,S71T,N79D,V102I,V106A,S131T,L133I,L139M,K141Q,L163I,P168M,D169N,V178I,R190K,I212V,K226R,S244T,M298L,R423L,S448A,G464S,N485D | A19G,S21A,A31G,S64T,V71I,D72A,N89T,S93A,C143R,L146Q,R218S | A47S,L76F,Q91K,A94V,H132S,P168T,S171T,A172T,I184V,V205I,N210T,P233A,A260T,A270E,Q271V,D272E,R276Q,V277L,I295T,V319L,T327M,A331G |
| ecl11 | V10I | L129I,F141L,S142A,N145E,H297Q | K2R,R3G,L4I,M5L,M9L,Q69R,S71T,V102I,E112D,L133I,K141Q,D150N,P168L,D169N,V178I,R190M,G193S,V196I,I212V,S244T,R297K,M298L,D407E,N408T,S448A,G464S,S484L | A19G,S21A,A31G,V71I,D72A,N89T,S93A,C143R,Q144R,S145D,L146Q,P147A,R218S | L76F,Q91K,A94D,H132N,S167A,S171A,A172T,I184V,N206S,D209E,T213E,E218G,P233A,A270G,Q271V,R276Q,V277I,E288D,I295T,Q303L,K325R,A331G,S344A |
| ecl12 |  |  | S244T |  | N90K,I295T |
| ecl13 | V10I | L129I,F141L,N145D,N165S,H207Q | K2R,L4I,M5L,I8L,M9L,N67D,Q69R,S71T,V102I,L133I,K141Q,P168L,D169N,V178I,R190M,G193S,V196I,S244T,R297K,M298L,S448A,G464S | A19G,S21A,A31G,V71I,D72N,N89T,S93A,C143Q,S145D,L146Q,P147A,R218S | Q91K,H132S,Q135K,A163S,S167A,S171A,A172T,I184V,D209E,T213E,E218G,P233A,A260S,A270E,Q271V,D272E,R276Q,V277I,I295T,V319L,K325R,A331G,S344A |
| ecl14 | V10I,I14V | L129I,N165S,Q204E,H207Q,L222I | R3G,L4I,M5L,M9L,Q69T,S71T,V102I,I122L,K141Q,P168M,D169N,R190M,G193N,I212L,K226R,E242D,S244T,R297K,M298L,S448A,G464E,E465D,T483I | S21A,L62Q,V71I,D72A,R218S | A47S,L76C,A94V,M109V,S171T,A172T,S175T,I184V,A191S,N210D,T213M,E218G,A230D,A260S,T265R,T269A,A270D,Q271V,R276Q,I295T,A331G,T345S,E347Q |
| ecl15 | V10I | L129I,F141L,N145D,H207Q | K2R,L4I,M5L,M9L,Q69R,S71T,N90D,V102I,L133I,K141Q,I161V,P168L,D169N,V178I,R190M,G193S,V196I,I212V,S244T,R297K,M298L,L387M,D407E,S448A,G464S,Q481E | A19G,S21A,A31G,V71I,D72A,N89T,S93A,C143R,S145N,L146Q,P147A,R218S | G72S,Q91K,A94D,H132N,S167A,S171E,A172T,I184V,N206S,D209E,T213E,E218G,P233A,A260T,A270E,Q271V,R276Q,V277I,S278G,R291Q,I295T,K325R,T327K,A331G,S344A |
| ecl16 |  |  | S244T |  | D209N,I295T |
| ecl17 | V10I | L129I,F141L,N145D,N165S,H207Q | K2R,L4I,M5L,M9L,M34L,K64T,E66K,N67D,Q69H,S71T,N79D,V102I,V106A,S131T,L133I,L139M,K141Q,L163I,P168M,D169N,V178I,R190K,I212V,K226R,S244T,M298L,R423L,S448A,G464S,N485D | A19G,S21A,A31G,S64T,V71I,D72A,N89T,S93A,C143R,L146Q,R218S | A47S,L76F,Q91K,A94V,H132S,P168T,S171T,A172T,I184V,V205I,N210T,P233A,A260T,A270E,Q271V,D272E,R276Q,V277L,I295T,V319L,T327M,A331G |
| ecl18 | V10I,I11V | L129I,F141L,N165S,H207Q | K2R,R3Q,L4I,M5L,M9L,Q69R,V102I,L133I,L139M,K141Q,A148E,L163I,P168M,D169N,V178I,G193S,I212V,K226R,S244T,R297K,M298L,S448A,G464S | A19G,S21A,A31G,A38S,S64T,V71I,D72A,N89T,S93A,C143R,L146Q,R218S | G72S,Q91K,A94D,H132S,S171T,A172T,I184V,V205I,N210T,P233T,A260P,T267A,A270E,Q271V,D272A,R276L,I280S,I295T,V319L,H323R,T327A,A331G |
| ecl19 | V10I,V38I,A40S | N145D | R3G,L4I,M5L,M9L,Q69R,S71T,N90D,V106K,S108R,T128S,E135D,S138A,K141I,D149E,A151D,E152D,P168L,D169N,V178I,R190M,G193N,I212V,S244T,R297K,Q405V,D427E,D458E,Q481H,T483V | S21G,A31T,S64C,D72E,C143R,L146Q,R218S | I25V,Q91K,S171T,A172P,I184V,E203D,D209E,N210T,T213A,G216S,K231H,P233A,G255A,T265E,T267A,Q271T,D272E,I280T,I295T,K325H,A331G,S344A,T345K,L346I,E347G |
| ecl20 | V10I | L129I,F141L,N145D,N165S,H207Q | K2R,L4I,M5L,M9L,M34L,K64T,N67D,Q69H,S71T,N79D,V102I,V106A,S131T,L133I,L139M,K141Q,L163I,P168M,D169N,V178I,R190K,I212V,K226R,S244T,M298L,N408T,R423L,S448A,G464S,N485D | A19G,S21A,A31G,S64T,V71I,D72A,N89T,S93A,C143R,L146Q,R218S | A47S,L76F,Q91K,A94V,H132S,P168T,S171T,A172T,I184V,V205I,N210T,P233A,A260T,Q271V,D272E,R276Q,V277L,I295T,V319L,T327M,A331G |
| ecl21 | V10I | L129I,F141L,S142A,N145D,T160M,H207Q | K2R,R3G,L4I,M5L,M9L,S71T,V102I,L133I,R134H,K141Q,D150N,P168L,D169N,V178I,R190M,G193S,V196I,I212V,S244T,R297K,M298L,D407E,S448A,G464S,S484L | A19G,S21A,A31G,A38S,V71I,D72A,N89T,S93A,C143R,Q144R,S145D,L146Q,P147A,R218S | Q91K,A94D,H132N,A163S,S167A,S171A,A172T,I184V,N206S,D209E,T213E,E218G,P233A,A260T,A270G,Q271V,R276Q,V277I,I295T,K325R,T327S,A331G,A332T,S344A |
| ecl22 | V10I,V38I,A40S | N145D | R3G,L4I,M5L,M9L,S71T,N90D,V106K,S108R,T128S,S131I,E135D,S138A,K141N,D149E,A151D,E152D,P168L,D169N,V178I,R190M,G193N,I212V,S244T,R297K,Q405V,R423H,D427E,D458E,T483G,S484L | S21G,S64C,D72E,C143R,L146Q,R218S | I22V,I25V,Q91K,S171T,A172P,S175N,I184V, E203D,D209E,N210T,T213A,G216S,K231H,P233A,G255A,T265E,T267A,Q271T,D272E,G273S,R276Q,I280T,I295T,K325N,A331G,S344A,T345K,L346I,E347G |
| ecl24 |  | H207Q | L4I,M5L,I8F,M9L,K64R,Q69K,S71T,L85M,S108R,S131T,P168T,D169N,S244T,D302E,S329A | S21A,C143R,Q144E,L146Q,R218S | A47S,Q91K,A172T,A270G,Q271L,I295T,A331G,E333Q |
| ecl25 | V10I,I11V | L129I,F141L,N165S,H207Q | K2R,R3K,L4I,M5L,M9L,Q69R,V102I,L133I,L139M,K141Q,A148E,L163I,P168M,D169N,V178I,G193S,I212V,K226R,S244T,R297K,M298L,S448A,G464S | A19G,S21A,A31G,A38S,S64T,V71I,D72A,N89T,S93A,C143R,L146Q,R218S | G72S,Q91K,A94D,H132S,S171T,A172T,V205I,N210T,P233T,A260P,T267A,A270E,Q271V,D272A,R276L,I280S,I295T,V319L,H323R,T327A,A331G |
| ecl26 |  | H207Q | L4I,M5L,I8F,M9L,K64R,Q69R,S71T,L85M,S108R,S131T,P168T,D169N,S244T,D302E,S329A | S21A,C143R,Q144E,L146Q,R218S | A47S,Q91K,S167L,A172T,V205I,A270G,Q271L,I295T,A331G,E333Q |
| ecl27 | V10I,I11V | L129I,F141L,N165S,H207Q | K2R,R3K,L4I,M5L,M9L,Q69R,V102I,L133I,L139M,K141Q,A148E,L163I,P168M,D169N,V178I,G193S,I212V,K226R,S244T,R297K,M298L,S448A,G464S | A19G,S21A,A31G,A38S,S64T,V71I,D72A,N89T,S93A,C143R,L146Q,R218S | G72S,Q91K,A94D,H132S,S171T,A172T,N210T,P233T,A260P,T267A,A270E,Q271V,D272A,R276L,I280S,I295T,V319L,H323R,T327A,A331G |
| ecl100 | V10I,V38I,A40S | N145D | R3G,L4I,M5L,M9L,Q69R,S71T,N90D,V106K,S108R,T128S,S131I,E135D,S138A,K141I,D149E,A151D,E152D,P168L,D169N,V178I,R190M,G193N,I212V,S244T,R297K,Q405V,D427E,D458E,Q481H,T483V | S21G,S64C,D72E,C143R,L146Q,R218S | I22V,A47T,Q91K,S171T,A172P,S175N,I184V,E203D,D209E,N210T,T213A,G216S,K231H,P233T,G255A,T265E,T267A,Q271T,D272E,I280T,I295T,K325H,A331G,S344A,T345K,L346I,E347G |
